# Supplementary material
Source: PubMed Central journal article supplement (PMC3970974)

a

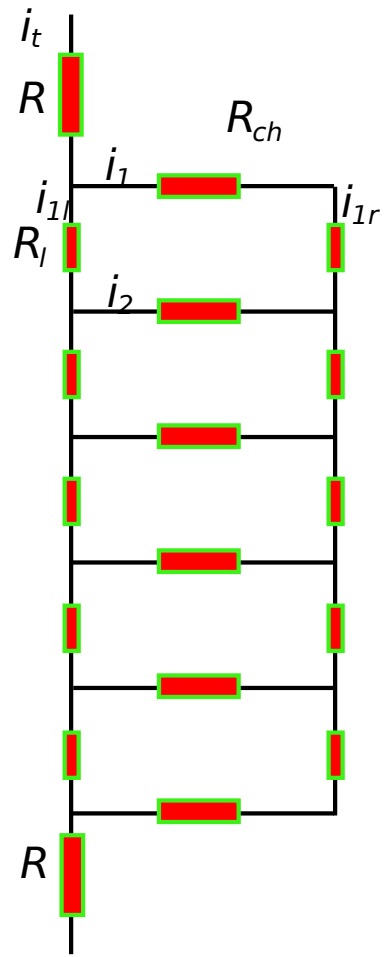

b

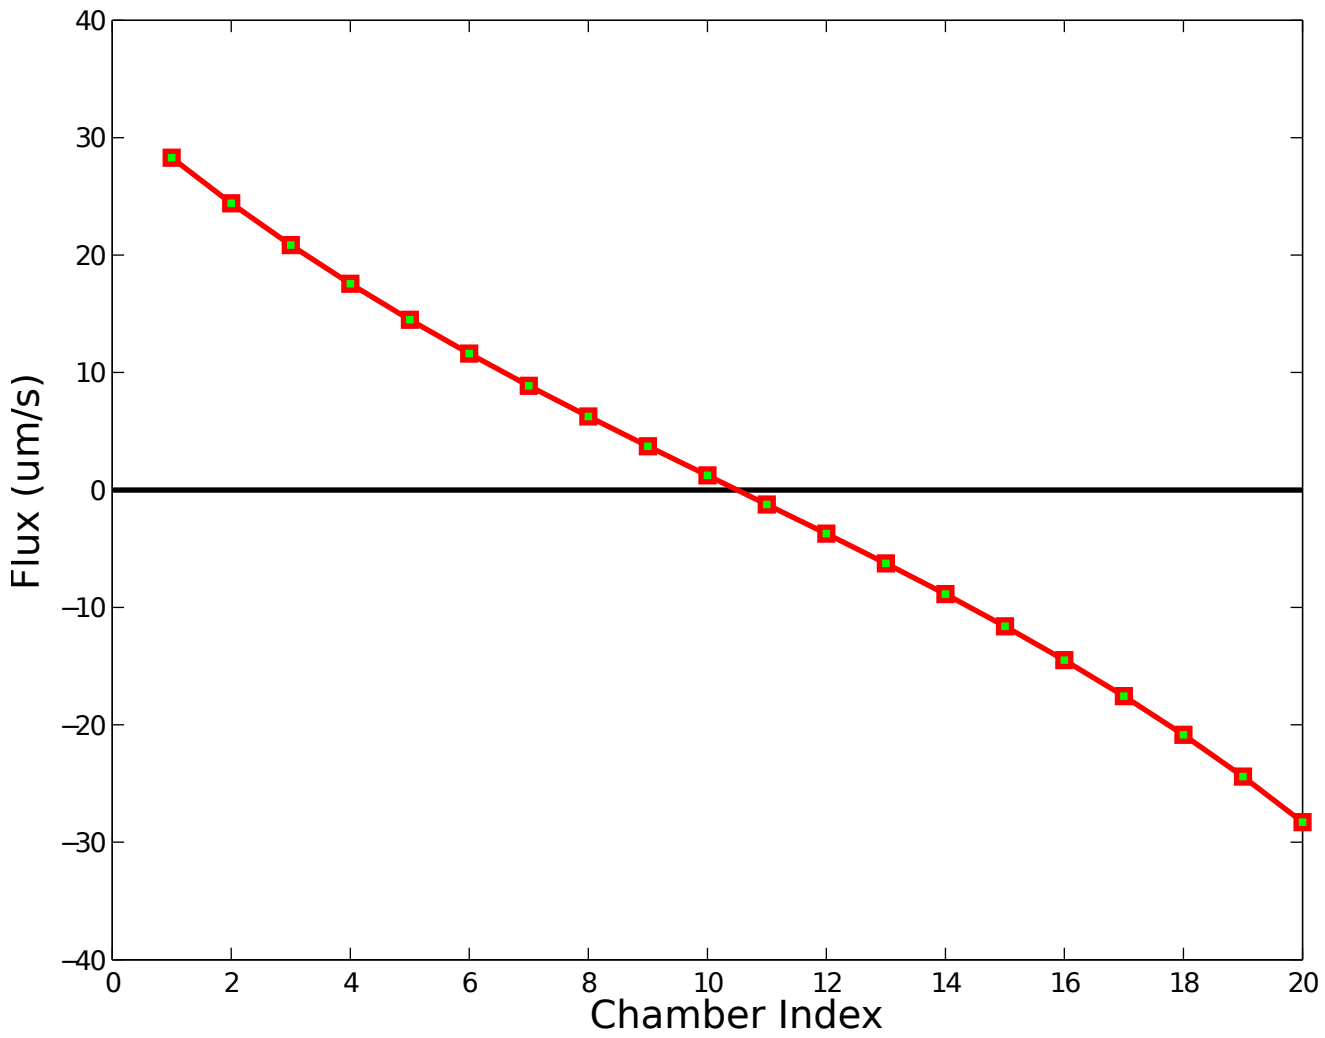

Supplement: NIHMS372021-supplement-Supp_Fig_S1.pdf [file NIHMS372021-supplement-Supp_Fig_S1.pdf]
